# Supplementary material
Source: Springer Nature journal article supplement (https://www.springermedizin.de/resource/supplementary/13048_2013_236_MOESM1_ESM.pdf/9665192)
Supplement: MOESM1 [file 9665192]

Additional table 1: Taqman probes used for gene-expression validation

| Gene         | Taqman probe/primer (Applied) |
|--------------|-------------------------------|
| THBS-1       | Hs00962908_m1                 |
| PDGF $\beta$ | Hs00966522_m1                 |
| KISS1        | Hs00158486_m1                 |
| NR4A3        | Hs00545007_m1                 |
| NME4         | Hs00359037_m1                 |
| MMP9         | Hs00234579_m1                 |
| RPL37a       | Hs01102345_m1                 |
